# Supplementary material
Source: PubMed Central journal article supplement (PMC7925108)
Supplement: JVI.01713-20-s0002.pdf [file JVI.01713-20-s0002.pdf]

## Sequences that were described in Table 2.

>contig1-Gammapapillomavirus 11

ATCAATTGGGATTCCATCTATTATCAAGATGAGACTGACATGTGGCATAAGGTAAAAGGGAAAG  
TTGACTATAATGGACTGTATTATGAGGAATTAGATGGAAGTAGAAATTTTTATTTTGTTC  
AAGATGCTGATAGATTTGGGAGTACTGGCGAATGGACTGTAAACTATAAAAGTGAACAAATTCT  
TCCTCCTTTTGTACCAGCTCTTCTCGGAGG

>contig1-Peromyscus papillomavirus 1

GGATAAAGGTGACTGTCCTCCTATTGAGAGATTAGGCACTGTCATAGAGGATGGTGACATGAT  
TGACATTGGGTATGGCAACCTAGACTTTTCGGCACCTACAGGAAAACAAATCCGAGACGCCCTT  
GACATAGTTGACTCCATCTGCAAATACCCTGACTATTTGGGCATGACTAAGGATACGTATGGCA  
ACTCATGTTTCTTCTATGCTAGGCGTGAGCAGATATATACACGCCACTTCTTTAGCCGTGCTGGG  
GTGCAGGGTGAGCAGGTACCTGAGAGTCTACTTCAAGGGTGCAGCTGGCCAAGGACAGAGC  
ACCCTCGCATTGGCCACGTATGGGGCCACACCGAGTGGGTCTCTGGTGCCTCGGACTCCGTAC  
TATTCAATAGCCATATTGGTTAGAGAGAGCACAGGGACAGAATAATGGCATCCTGTGGAACA  
ACCAGCTCTTCGTAACACTTGTGGACAATA

>contig2-Peromyscus papillomavirus 1

ACTTAGCCTCCTCCCCAGCAACCGCAGCAGAAACCATTGTTTGTCTTTGAATCCACTCCGGGGT  
AACACCGTGTATATGCGTGGCAGGTGCTAAACTACTCTTATACCAGTATAATGCTGCCGGGACA  
CTCTGCACCCTTGGCGGGTTCATTACACAGAGCAGAGGATCAATGTGAAATATCTGGCTTATCT  
GCTTGGTCAGCGTGTCTTACTTGGCATGATGAAATCTTAAACAACATCAGGGCTACCGGCC  
TTTCTCAGAGGGTCTATA

>contig3-Peromyscus papillomavirus 1

ACGCCATAACCACCCAGTCAGGATTACAAGTCTTATTGCTTTTGTATTACGTTAACTCTTTAA  
AACCAACTCCATACACG

>contig1-Bat hepatovirus

GGATACACGTCCCCTTTCCCTCCAGCAACATGGATTCCAATTATTGGATTTTGCAATTTTGAATTTG  
ACGAAACCAATCCTCCCCACACATTCCAGCAGAGGACATTCTTTTCCCCTCCAAGCTTGGGA  
AATGGTCAATTCTTTTATAT

>contig1-Bat mastadenovirus

TGTTAACCCTTTTAACCATCACAGGAATGCCGGGCTCAGGTATAGGTCCCAGCTTCTGGGCAAC  
GGCGGGTTTGTGAGGTTCCACATTCAGTCCCCAGAAATCTTTGCCATAAGAAACCTGCTGC  
TCCTTCCCAGGACCTATACCTACGAGTGGTCTATTAGAAAAGATGTAAATATGATTTTGCAGAGC  
ACGCTCGGAAATGATCTCCGTGCGGATGGAGCCTCTATTGAAATTACCAGCGTCAACCTCTATG  
CCAGTTTCTTCTCTGGCTCACAACACCTAT

>contig1-Bat mastadenovirus G

CACTGGAGGATACCAGGCTGGCAAGGGCTTGATGGAAGTTAGAGTGGTACTTTATTTCTACAGA  
TTGACCGTCGTCCAGCACAGCCGAGATGCTCAGCGTGGCTCTTTGGGCTACGACAGTGCCCTTG  
TATTGCCTGCGGGTGGTCTTACGGAGGCAGCTGGACGTGGGCATGCTGGGCTGGCAGAGGGC  
GGTGGTGGGACCTGAGCTCTGTAGCCAGGGCTACTACTCTCCTGTTGATGGTTTGAATTTGCTTG  
TTCTGAGTGAACACTACCGTCCCGTTACTTTGAACCTAAAAGAGAGTTCCATAGAGTCAATCTC  
TGCATCGTTTACCGCTACCTGTCGCAGTATTTCTCCTACATCGCCACTGTTATCATGATAAGCGAT  
GTCTGTCATAAACTGCTCCATTTCTTCTTCTAACKCTCCAAGCCCCGCCCTTCAACGGTAGC  
AGCAAGATCGCCAGATATGCGCTCCATCACCTGACTGAAAGCATTTTCTCCATTTCAATCCATA

CTCTGCGGTACACTACCTCCTAT

>contig2-Bat mastadenovirus G

TACTAGAATTAAGCAAAAAGAAACTCCAGCTCTGGGATCTCCATATGACCCATACTTTACATATT  
CAGGCACCATTCCATATTTGGACGGAACCTTTTTATTTGAGTCATACTTTCAGAAGAGTATCAATTA  
TGTTTGATTCTCGGTTTCTTGGCCAGGCAACGACAGGCTGCTAACTCCCAACGAATTTGAGATT  
AAGAGATATGTAGACGGAGA

>contig1-Bat parvovirus

TGTTTGTAAGTGTTCATAAAGTTAAATTGAATGATTCTCTCTTTTAGAGGTACAGAGTGTATTCCT  
GTAGTTGCATTGCCTCCTACAACCTTCATATAGGTTGTGGTTGGTTGAGACAATGACAGGTGTTTT  
TGGTAGTATCATGCTGTCTTTATGTTTTCTGTCTATTCTGAATTCAGTTCCACCAATATACATTTA  
GCAGGTTCTACCC

>contig2-Bat parvovirus

TCTGGCATGATGCCTTCGTCCCAGGGCCGACTGGCATCTGGGTATTGATGTTCTCCATCACAGA  
ATACGTGTAAGGCAGCTGTGAGATCATTGTTGTACACAATGTCTTGTTTCAGCGCCTAGCAATTGG  
ATTTGTTTTATTTGTAGGTTGTAGATTTTTACTTCCATTTCTGCAGGTTTGATAGATTTGTATTCATT  
CATGACTCTTTGCCAATCTTGTGGACTAAAGTGTGAGGCCAGCAGTTAAAAT

>contig1-Myotis myotis bocavirus 1

TGGTTATGCTGTGTATTAATAAGCAATCAGGAAAACAAAATACTGTGAACCTTTTATGGGCCTGC  
AAGCACAGGCAAACTAACATTGCAAAAGCAATTGTCAATGCATGTTTACTATATGGCTGTGTTA  
ACCATTCAAACAAAGG

>contig2-Myotis myotis bocavirus 1

AGGGGTAGGTATCAGCACAGGTGGGTGGGAAGCAGGCACATTCTTTTACAGAGACCACATTAT  
AACATGCAACACCAGACAATTCATGGCAGAAATTCAAAACAGCCACTTATACAAATTAGAACT  
GCTACCATTCTGCAGAAGTGCCTGATGCAAATTACACATATGTGACAACACCATGGCAATATTT  
TGATTTTAACTGCTGGGCCTCACACTTTAGTCCACAAGATTGGCAAAGAGTCATGAATGAATACA  
AATCTATCAAACCTGCAGAAATGGAAGTAAAAATCTACAACCTACAAAT

>contig1-Mouse kidney parvovirus

GACCTACACAATGCTTCCCCAAAGGCATTCCATTATTCGATGATAATGACACCCATGTAGCCAC  
CACCACACAAGGCTGTTTCAGGATCAGTCTACACCTAGCGGGGAAAAAAGACGCAGCCGCAT  
CTATGCACCAACATGGGGTCCACTCTCCTGGAGACAATGCTATGCCACCGACACGCCATTCGCT  
CCCAGCATGGTCAGATACAGAACAGGAGGAGCGAGAAGAACGTGGACAAATATCAACAGAGA  
TGCAGAAGGAGTCCACAAAGATTTCCACTACAGAGAAGATCCATATGATATCACCTCAACCGTC  
CCAGACACCAGAGGAACTGCAACAGTCAACGACAGTAAAGCCACCATGCACCCATATGAACAA  
GCAGCCTCCGGCATGTACCTCAACCATAAGGAAATGAGACAAGTCCGCGCAGCCGCAGAAAGC  
AACACGATCTCAACCTGCTGTAGCCATGCAAACCTCAATAAAAAGTCCCTGTGTCTTACAAACC  
ACATCCACACAATACAAAATCTTATTGTTAACCCGCCTCCCAATCT

>contig2-Mouse kidney parvovirus

AATCTACTTTACAAAGAGCTCTCGGTGATCTCTATTACAGGAGCTTGTCACCTTTCAGAAGGGA  
CCGCCGGACACTTCCTTTGACAGCGCCCTACGCTACCAAAAATGCAAGCGCAAATGGAACGTG  
CCCGACGTAGTCTCTTCCCTCAGACGATACTGGTGGGGCGGCAACGCCTGTCATCAGCTTTC  
GGAAGAAAGCGAGATAATTTACCAGAAAATCTCAAACAAATCATGCTTAACTGGGACTCTCGG  
GTATGGCAAGCCTGTGTACTGGGGATATGGGATACCGTACCTGTCAGAGATCCTAGACCTTATT  
GCTTCTTACTAACCAATATTCCTTCTGTTAAAAAATGGTTAATTTGTGCTGAAGAAGATAGCAATG  
AACAGACTCATATTCACCTGTTAGCTCTCACCTCACAGAGATCAGATGCTTTTAAAGAGAACCTTA

GAGAAAACCTGGAAACAGGTAGCTATAGTGGCTATGTCAGATATAGAAGAACCAGATCCAACC  
TTAGA

>contig3-Mouse kidney parvovirus

ATGCTGTTTCATATAAATCATCTTGTGCTCCTAGTGTATAGATTGTATTGTTGAAAGCAGTGAAAG  
CGGTAGTGCCTTGGATTGCCAGCTGTTGTGTCATAGGAATAGGATTATATATGGTGCAGGAATAT  
CCTTTAACTGTATATGCTTCATAATTAATAGTGAATTCTGTCCATTGCTTGGGTGTGAGGAAATGT  
TTCCAGAGGATAGTTGGGATTATATGCCATCCCGTATTGATAGCTCCGGCTGACATAGTATGTGC  
ATTTGGTGGATTGATATTGGTGTTTGGATAGATGAAGGGTTGATTTTTCCAATAGACCATATAGG  
TGTTATGAAAGGTGACATCTTCAGCCATAGTGTCTGTAAATAAGATAGATAAGTGAACCATTG  
TGCTCGTGTAGGAATATTTAAGGTGCCAGATCCCCACCCATGCCTGTGACGGCGGTTGAAACC  
TGATCCCGTGCTTTTTGCTTTGGGTTTCCCCAACACCACATTTCTTGGCTATGTCTGCGTTTTTC  
CTCTAGGTCTGCTAATATCTGAGCTACCTGTGAGCTATCTGGGCTTGTAGGTTCTCCATTCTAT  
CTCTTGGGAGATCATCTCCCGTCTTAT

>contig4-Mouse kidney parvovirus

ATACACGCTTTCAATCTATCATTTAAAGAAGGACAGTACAAAAATCTCAGTGGTTCATGGAAAA  
AAACCATATGGCCAATATACTCATGGAGAACAGAAAATGCCCCGAAATGCCTCTTCTCCACCTA  
TTCATATCTCAATGGTATAGACAGTTATGCAGTCTGGCCGAGAACAAAAGACAAAAGAGTTAATA  
CCAACAGGGGTATTCTGGGATCCATTAATGATGCAATGGGATATTGGAATTAAGACCTGGAA  
AGAATTCTATGCCTTCTCCTGGGAACAACATCCCTGTGATGAAAATAAATGGTTTAACATTGAT  
CAAATTGCGAAATGGTTTCCTTACACCGTCGATACACCTTATCTAAACCCACAACCTATCC

>contig1-Human rotavirus A

GGAGGATAACCCATACGGTCAAAGTTATACGAATCCAAAATTAGTTTATCATATTTATCACAAAG  
ATTCGTGAATGAAAATGGAGTTTGATTAACCTTCTGACATGTTATCATAATATCCGAATATATGATA  
ATTTTTCTTTCGATATTTATTGTTAGAGCTTGAAGTGAATAGGCATCAGTAAATGATTATACCA  
CTGTACCTCATACTCGCTTCGACATTTATTTGTTAATATTTGACAT

>contig1-Bocaparvovirus sp.

GGGCACGTACCCAATGCAGGCATGGAATGGACAAGAAATAACAAGGTATGCTCCAATTTGGGA  
CAAACAGCCAAACACAGACTTTCACACCACACTATCGTCATCAGACGGAACACTGCCGATGAA  
ACACCCACCAGGCAACATTTTCATTAAGTAGCTAAAATACCAATACCAACAGAATCAGGAGAT  
GATTCCTATTTAAACATATACTGCACAGGACAAATTTTCAGTTGA-  
AATCGAATGGGAAGCTGAACAATATGAAACAAAGAACTGGAGACCAGAGCTCAGAATAACATC  
ATCAAACATAGGCAGAAAAGACAATAA

>contig2-Bocaparvovirus sp.

TAGTTAATGTTTGTCAATTAGACGGTTACCACCTGCTTGACTTTCCATCATTATCACAAAGTTCCG  
GATGCTTATCAACAAGCTGTTTCATAGGTCAAACAATCTGATTCAATTGCTCTATTACATAATCTA  
ATACTAGACTTTCCCGCTTAGACATTCTCCGCCCCGATTTGCTGTTTGTCCATTGAGCCTTGC  
TTACCTTCGGTAAGTCTGAAAGAGGATCTCCTGTAAAAA

>contig3-Bocaparvovirus sp.

TGTGTGGCAGTATCCAATGCAGGCATGGAATGGACAAGAAATAACAAGGTATGCTCCAATTTGG  
GACAAACAGCCAAACACAGACTTTCACACCACACTATCGTCATCAGACGGAACACTGCCGATG  
AAACACCCACCAGGCAACATTTTCATTAAGTAGCTAAAATACCAATACCAACAGAATCAGGAG  
ATGATTCCTATTTAAACATATACTGCACAGGACAAATTTTCAGTTGAGAATCTTTGTGTT

>contig1-Himalayan marmot bocaparvovirus 1

TGGCGATTGCAACTGGCGTATGGGTTGGTGGTACATACTTTGGAAAACACAAAGTGGTTACAAA

TGTTACACGACAATGGTATGTGCCAATTTATAATGGACACAAATACACCAAACAAACAGAAACA  
GACAACAATGGGTTCTGGACAGGCATAAGAACTCCGTGGGGATACATCAACTTGAACGCATAC  
AGCTGCCATTTTTCTCCTAATGACTGGCAAAGACTACTAAATGAGTACAAAAGATGGAAGCCCC  
ATAAAATGAGAGTACAGCTGTATAACTTGCAAATAAAGCAAGTGGTCCAATTAGGAACTGACAC  
GCTATACAACAATGACCTAACAGCGGGGTACACATTATGTGTGATGGATCACATCAGTACCCA  
TATTCACAAAATGGATGGGACGAAGAATTGCTGCCAGAGTTGCCGAGCTCAATCTATAAGCTGC  
CAAATTA

>contig2-Himalayan marmot bocaparvovirus 1

ACGGACTATCCAAGCCAGAGCCAATTTTTACAGGAGATCCTCTTTCAGACTTACCGAAGGTAAG  
CAAGGCTCAATGGGAACAAACAGCAAATCCGGGCGGAAGAATGTCTAAGCGGGAAAGTCTAG  
TATTAGATTGTATGAATAGAGCAATTGAATCAGATTGTTTGACCTATGAACAGCTTGTGATAAG  
CATCCGGAAGTTGTGATAATGATGGAAAGTCAAGCAGGTGGTAACCGTCTAATTGAACAAACAT  
KAACTATGGTACACATAAACTTACGCAAAAAGTA

>contig1-Porcine bocavirus 1

GATACAGGGTATCCCCACGGAGTTCTTATGCCTGTCCAGAACCCATTGTTGTCTGTTTCTGTTTGT  
TTGGTGTATTTGTGTCAGTTCCTAATTGGACCACTTGCTTTATTTGCAAGTTATACAGCTGACTCT  
CATTTTATGGGGCTTCCATCTTTTGTACTCATTTAGTAGTCTTTGCCAGTCATTAGGAGAAAATG  
GCAGCTGTATGCGTTCAAGTTGATGTATCCCCACGGAGTTCTTATGCCTGTC

>contig1-Bat polyomavirus

ACTACTATTGAGGCCTACCTAAACCCAAGGATGGGACAGCCTCCTGAGTCTGATTTCTATGGATT  
TAGTGACAATATTACTGTCTCCAGAACTTTGAAAATGATCAGCCACAGCTTAAGGAGATTCCCT  
GCTACAGCATGGCCAAAATTTCACTTCCTTTGCTGAATGAGGACATTACCTGTGACACAATTTTG  
ATGTGGGAAGCAATCAGTGTAAGAC

>contig1-Rotavirus H

TGGAGGATAGCTGACGATCAGTTGCCAGGCAATTAATTCATTATAAACTAGATTGCATAATATA  
TCAAATGTCTCATCATCCATATTCTCTGGATTAGTTGGCAGAACGACTAATGCTAGCATTGCTGA  
CATTGCTGCACCAAATGATGATTGACCACCAACAAGGTCCAATTCACATCTGAAAAATGCCATG  
TTCAATAAAGCGTTCAATGTTTGTTGAGCTGATGCGATATTAATTGTTGACAAAGCAGATGTAGT  
TGCATCGATTGTAACCATTGAACTTCAGCTGCAGCATAAATGTTTGTAAATTTCAATTTCAAGTGA  
TGTCTTAAAAACATTTGTTCTCCAGAGCTTTGACATCATTCTCATTGAATGTATAATTCTAGATCT  
ATAAGGTGGTCCAGATAATTCGCACATCCATAT

>contig2-Rotavirus H

TTCCAGAACACCYATGTATTGGAAATCCAAGAGGTAATTTCTATAAGGCATTCCCAGTAAAGAA  
AGATGAACCAATGGTTTATGGTGTAAAGCATTAGTTGGAATTTGGAATAGAGACTTTATTATGA  
ACCATGGTCATGGGCATTTAAGAATAACCTTATCAAGAAATAAATAATGCAATTAGATCTTTT  
GCAAGAAAATCTGAACAAGAAATCAGGAAAATAAAGTCTGATCCATGACACCTAT

>contig3-Rotavirus H

CTAAGATTCTATTTAAATTCGAAGCTACTTATGCACGATCTGCTACTTGCAAATATGACAAACT  
ATATGAAGCACCTGGTTTTGGAGCAACACAGCTAAATTCGTTACCATTGGATCTGACTGCTGCA  
GAAAAGTTTTTTCAATCAAAAATAACATGCCATCTTCATATTACGAGTTGATGATGCTTATTTTA  
CTCTATGAGTATGTTAACTTTGTTATGTTACAGGACAAACATATCC

>contig4-Rotavirus H

TTATAAKTTTAGCATCTGATTTTCATAGCTACTCTAACTGATTGAATCATCCTATCCGTTCTTGCCTT  
GAATTGTGGTGTGTTGAATATTGTTGATTTCTTCAGGTTCAATTGATATTGAAAGCGACGAAGT

CAAAATTTTAAACAACCTCCATGTTCTTTCTGTTAATTTGGAAAAACCTCATCCTTCCACCTAATCC  
ATACGGAGTGATTTCAAACGAGATTGGACCAGTTGAAAAT

>contig5-Rotavirus H

AGCATGTATTCTCTAATTACTGGAGCAAGATCTTGCAATTGGTTCTGCGAACTGTTGCGCGATCCT  
TATCAATTGTAGGTCAAATGGGTGCAGTCTAACGTTAAATTGAACTGTTCTGTTCTGAGCATCTA  
CAATTACATTATCGAATTGAACTGCTGCTCTCCTGACATCAAGTCCTCTATCG

>contig6-Rotavirus H

CTGGAGGATATGCGTTTGAAGTTGTTCACTGCCATGTAACCTTTGATCATTAAATGTTGGCTAAGTC  
AATGTTTGGTACAAGTATGTGGCAATTTCTCCTAACATCTCTCGAATTTACAAGTGGCAACCATG  
GCTTTCTTAGCAATACAAACCTCATATAATTTGTAATGTCTCTATTTAGTCC

>contig7-Rotavirus H

GAAAAATCCTCTTGCAAATATGCTACAGGTTGATACGGCTAAAATGGAACAGCAGGTTGAACCA  
GCAGATGATCCATTTGCAAACATGCGAGTTAACTTACTTGCACCCGGAGGAGCAACAAATAACA  
C

>contig8-Rotavirus H

TTTTACAGCTGAACGGCCATATGGAACCGACCAATCAGTTCAATCAACTACAGGTTCTTTGATTT  
ATTCTGCAGCAGTTAACGCATATAGAGGATTTGGTGA

>contig9-Rotavirus H

AACTGTCATTTATCAGATTATTATTCTCCAGGTATTCGTATGTATTCTTGAATTCTTCTTGTGATG  
TGGTTCGCCTTGACCAATTCTATAACGATCTCTTTTATTTGTTCTTTTAAACAATTGTTTGTCTCA  
ACGAGCCACCGAAATGGTGACATTGTATATACCAGTGAATTGAAAGAAGCTTCAATTGCGATTA  
AATGTCCTGAATATCCTTCAAATTTATTCTTTTGAACCTTAGATATCCTCCA

>contig1-Bat circovirus POA/2012/V

CAATTATCTTATCAATTCTCCGCATTAATTGTTATATCGGTTTCGTCCTCGAGTTGATAAACCTTATC  
TGGGTGAACGATTGTTGTTATAAAAATATTTTTCGAATTCAGTTGTCGATAGCCTCCCTTAACTTC  
AACACGCATTGGATATCTATCAAGCAAACGAAGTAAGTAATTAATTTTTCATGTTGCTTGTCTAA  
AGTCGTCAATTATAATGCTTTTCGTGTCTATCGTATCCATCCACCATTTTTTCGCCGTCTTTCCAAT  
AAACATCATCTCCTGCTAATTCTTGAGCTTTTCTTGACTTTCCAGTACCACTTGCTCCCCATAACC  
AAGTACTGTCGGCTTTTCAATTTCTTACTGGTTCTAAAT

>contig1-Bat calicivirus A10

CAAAAGCAGTAAATTGAGCAACAGTTTTAAGAGTAGTAGGATCAATGTTAGGAGGGATACGAG  
CAATACCAAGTGCACCAGCATGAAAGCCAGTACCCGCAACCTTAGCTTGATATTCCAAGCCTCC  
ATTCCAAGCATTGAAGATACCTGAAAGGTAAGAAATGACATTATTAGCTCTAAGAGGAGTAATA  
GGAATGTTTACTAGTAAAGTACCAGGAAGTTGGCTTGTTGACCAGGTAACCGTTGTAGAGAAA  
TATGCTGTTTCTTGAGGTACCCCATAGTA

>contig1-Canine parvovirus

GTCATGTTTTACTTCATAGTAAGAAGTTACAACAAGCAACTGGTAAATGGCTACGCAGACAAAT  
GAATATGTATTGGAGTAGATGGTTGGTGAAGTCTTTGTTTCGGTAAACTTAAACCAACTGAAAAGA  
TTAAGCTCAGAGAAATTGCAGAAGATAGTGAATGGGTGACTATATTAACATACAGACATAAGCA  
AACAAAAAAGACTATGTTAAATGGTTCATTTTGGAAATATGATAGCATATTACTTTTTAACAA  
AGAAAAAATTTGTCACATGACAAAAGAAAGTGGCTATTTTTTAAAGTACTGATTCTGGTTGGAAA  
TTAACTTTATGAAGTATCAAGACAGACAAATTGTCAGCACACTTTACTGAAACAAATGAAACC  
AGAAACCGTTGAAACCACCTGTAT

>contig2-Canine parvovirus

CATTTAGTTAGTTTTGAACAAGAAATTTTAAATGTTGTTTTAAAGACTGTTTCAGAATCTGCTACTC  
AGCCACCAACTAAAGTTTATAATAATGATTTAACTGCATCATTGATGGTTGCATTAGATAGTAAT  
AATAC
